# Supplementary material for: Establishing ecological baselines around a temperate Himalayan peatland
Source: Springer Nature journal article supplement (doi:10.1007/s11273-020-09710-7), 2020-02-11
Supplement: 11273_2020_9710_MOESM1_ESM.pdf [file 11273_2020_9710_MOESM1_ESM.pdf]

Electronic Supplementary Material.

O'Neill AR, Chhetri PK, Chhetri B, Rana SK (2020) Establishing Ecological Baselines Around A Temperate Himalayan Peatland. *Wetlands Ecology & Management*.

**Table 1.** Reported biodiversity within the Khecheopalri watershed

**Table 2.** Hydrology and nutrient dynamics of Khecheopalri peatland

**Table 3.** Local allometric equations for common tree species within the Khecheopalri watershed

**Table I.** Reported biodiversity within the Khecheopalri watershed

| ID | Kingdom  | Family        | Species                          | English Common Name           | IUCN Red List Status  |
|----|----------|---------------|----------------------------------|-------------------------------|-----------------------|
| 1  | Animalia | Accipitridae  | <i>Aegithalos concinnus</i>      | Black-throated Tit            | Least Concern         |
| 2  | Animalia | Accipitridae  | <i>Ictinaetus malayensis</i>     | Black Eagle                   | Least Concern         |
| 3  | Animalia | Accipitridae  | <i>Nisaetus nipalensis</i>       | Mountain Hawk-eagle           | Least Concern         |
| 4  | Animalia | Aegithalidae  | <i>Pernis ptilorhynchus</i>      | Oriental Honey-buzzard        | Least Concern         |
| 5  | Animalia | Aegithalidae  | <i>Spilornis cheela</i>          | Crested Serpent Eagle         | Least Concern         |
| 6  | Animalia | Alcedinidae   | <i>Halcyon smyrnensis</i>        | White-throated Kingfisher     | Least Concern         |
| 7  | Animalia | Anatidae      | <i>Anas crecca</i>               | Common Teal                   | Least Concern         |
| 8  | Animalia | Anatidae      | <i>Anas platyrhynchos</i>        | Mallard                       | Least Concern         |
| 9  | Animalia | Anatidae      | <i>Aythya baeri</i>              | Baer's Pochard                | Critically Endangered |
| 10 | Animalia | Anatidae      | <i>Aythya fuligula</i>           | Tufted Duck                   | Least Concern         |
| 11 | Animalia | Anatidae      | <i>Mergus merganser</i>          | Common Merganser              | Least Concern         |
| 12 | Animalia | Anatidae      | <i>Tadorna ferruginea</i>        | Ruddy Shelduck                | Least Concern         |
| 13 | Animalia | Apodidae      | <i>Aerodramus brevirostris</i>   | Himalayan Swiftlet            | Least Concern         |
| 14 | Animalia | Buprestidae   | <i>Agrilus lineatomaculatus</i>  | Jewel Beetle                  | Not Assessed          |
| 15 | Animalia | Campephagidae | <i>Lalage melaschistos</i>       | Black-winged Cuckooshrike     | Least Concern         |
| 16 | Animalia | Campephagidae | <i>Pericrocotus brevirostris</i> | Short-billed Minivet          | Least Concern         |
| 17 | Animalia | Campephagidae | <i>Pericrocotus ethologus</i>    | Long-tailed Minivet           | Least Concern         |
| 18 | Animalia | Campephagidae | <i>Pericrocotus speciosus</i>    | Scarlet Minivet               | Least Concern         |
| 19 | Animalia | Certhiidae    | <i>Certhia nipalensis</i>        | Rusty-flanked Treecreeper     | Least Concern         |
| 20 | Animalia | Cettidae      | <i>Horornis fortipes</i>         | Brownish-flanked Bush Warbler | Least Concern         |
| 21 | Animalia | Cettidae      | <i>Tickellia hodgsoni</i>        | Broad-billed Warbler          | Least Concern         |
| 22 | Animalia | Cettiidae     | <i>Cettia brunnifrons</i>        | Grey-sided Bush-warbler       | Least Concern         |
| 23 | Animalia | Cettiidae     | <i>Cettia castaneocoronata</i>   | Chestnut-headed Tesia         | Least Concern         |
| 24 | Animalia | Cettiidae     | <i>Abroscopus superciliosus</i>  | Yellow-bellied Warbler        | Least Concern         |
| 25 | Animalia | Chloropseidae | <i>Chloropsis hardwickii</i>     | Orange-bellied Leafbird       | Least Concern         |
| 26 | Animalia | Cisticolidae  | <i>Orthotomus sutorius</i>       | Common Tailorbird             | Least Concern         |
| 27 | Animalia | Cisticolidae  | <i>Prinia atrogularis</i>        | Black-throated Prinia         | Least Concern         |
| 28 | Animalia | Columbidae    | <i>Columba hodgsonii</i>         | Speckled Wood Pigeon          | Least Concern         |
| 29 | Animalia | Columbidae    | <i>Macropygia unchall</i>        | Barred Cuckoo-dove            | Least Concern         |
| 30 | Animalia | Columbidae    | <i>Streptopelia chinensis</i>    | Spotted Dove                  | Least Concern         |
| 31 | Animalia | Columbidae    | <i>Streptopelia orientalis</i>   | Oriental Turtle Dove          | Least Concern         |
| 32 | Animalia | Columbidae    | <i>Treron sphenurus</i>          | Wedge-tailed Green Pigeon     | Least Concern         |
| 33 | Animalia | Corvidae      | <i>Cissa chinensis</i>           | Common Green Magpie           | Least Concern         |
| 34 | Animalia | Corvidae      | <i>Corvus splendens</i>          | House Crow                    | Least Concern         |
| 35 | Animalia | Corvidae      | <i>Dendrocitta formosae</i>      | Grey Treepie                  | Least Concern         |
| 36 | Animalia | Cuculidae     | <i>Chrysococcyx maculatus</i>    | Asian Emerald Cuckoo          | Least Concern         |
| 37 | Animalia | Cuculidae     | <i>Cuculus canorus</i>           | Eurasian Cuckoo               | Least Concern         |
| 38 | Animalia | Cuculidae     | <i>Cuculus micropterus</i>       | Indian Cuckoo                 | Least Concern         |
| 39 | Animalia | Cuculidae     | <i>Cuculus saturatus</i>         | Himalayan Cuckoo              | Least Concern         |

## Electronic Supplementary Material.

|    |          |                |                                  |                                  |               |
|----|----------|----------------|----------------------------------|----------------------------------|---------------|
| 40 | Animalia | Cuculidae      | <i>Culicicapa ceylonensis</i>    | Grey-headed Canary-flycatcher    | Least Concern |
| 41 | Animalia | Cuculidae      | <i>Hierococcyx sparverioides</i> | Large Hawk-cuckoo                | Least Concern |
| 42 | Animalia | Cuculidae      | <i>Surniculus lugubris</i>       | Square-tailed Drongo-cuckoo      | Least Concern |
| 43 | Animalia | Cyprinidae     | <i>Ctenopharyngodon idella</i>   | Grass Carp                       | Not Assessed  |
| 44 | Animalia | Cyprinidae     | <i>Danio aequipinnatus</i>       | Giant Danio                      | Least Concern |
| 45 | Animalia | Dicaeidae      | <i>Dicaeum ignipectus</i>        | Fire-breasted Flowerpecker       | Least Concern |
| 46 | Animalia | Dicruridae     | <i>Dicrurus leucophaeus</i>      | Ashy Drongo                      | Least Concern |
| 47 | Animalia | Dicruridae     | <i>Dicrurus macrocercus</i>      | Black Drongo                     | Least Concern |
| 48 | Animalia | Elateridae     | <i>Penia sikkimensis</i>         | Sikkim Click Beetle              | Not Assessed  |
| 49 | Animalia | Eurylaimidae   | <i>Psarisomus dalhousiae</i>     | Long-tailed Broadbill            | Least Concern |
| 50 | Animalia | Entomobryidae  | <i>Sinella cuvista</i>           |                                  | Not Assessed  |
| 51 | Animalia | Fringillidae   | <i>Carpodacus erythrinus</i>     | Common Rosefinch                 | Least Concern |
| 52 | Animalia | Fringillidae   | <i>Carpodacus sipahi</i>         | Scarlet Finch                    | Least Concern |
| 53 | Animalia | Fringillidae   | <i>Chloris spinoides</i>         | Yellow-breasted Greenfinch       | Least Concern |
| 54 | Animalia | Fringillidae   | <i>Mycerobas melanozanthos</i>   | Spot-winged Grosbeak             | Least Concern |
| 55 | Animalia | Fringillidae   | <i>Procarduelis nipalensis</i>   | Dark-breasted Rosefinch          | Least Concern |
| 56 | Animalia | Haplozetidae   | <i>Rostrozetes foveolatus</i>    |                                  | Not Assessed  |
| 57 | Animalia | Hirundinidae   | <i>Hirundo rustica</i>           | Barn Swallow                     | Least Concern |
| 58 | Animalia | Laniidae       | <i>Lanius schach</i>             | Long-tailed Shrike               | Least Concern |
| 59 | Animalia | Laniidae       | <i>Lanius tephronotus</i>        | Grey-backed Shrike               | Least Concern |
| 60 | Animalia | Leiothrichidae | <i>Actinodura egertoni</i>       | Rusty-fronted Barwing            | Least Concern |
| 61 | Animalia | Leiothrichidae | <i>Alcippe nipalensis</i>        | Nepal Fulvetta                   | Least Concern |
| 62 | Animalia | Leiothrichidae | <i>Cutia nipalensis</i>          | Himalayan Cutia                  | Least Concern |
| 63 | Animalia | Leiothrichidae | <i>Garrulax albogularis</i>      | White-throated Laughing-thrush   | Least Concern |
| 64 | Animalia | Leiothrichidae | <i>Garrulax caerulatus</i>       | Grey-sided Laughing-thrush       | Least Concern |
| 65 | Animalia | Leiothrichidae | <i>Garrulax erythrocephalus</i>  | Chestnut-crowned Laughing-thrush | Least Concern |
| 66 | Animalia | Leiothrichidae | <i>Garrulax leucolophus</i>      | White-crested Laughing-thrush    | Least Concern |
| 67 | Animalia | Leiothrichidae | <i>Garrulax ruficollis</i>       | Rufous-necked Laughing-thrush    | Least Concern |
| 68 | Animalia | Leiothrichidae | <i>Garrulax squamatus</i>        | Blue-winged Laughing-thrush      | Least Concern |
| 69 | Animalia | Leiothrichidae | <i>Garrulax striatus</i>         | Striated Laughing-thrush         | Least Concern |
| 70 | Animalia | Leiothrichidae | <i>Heterophasia capistrata</i>   | Rufous Sibia                     | Least Concern |
| 71 | Animalia | Leiothrichidae | <i>Leiothrix lutea</i>           | Red-billed Leiothrix             | Least Concern |
| 72 | Animalia | Leiothrichidae | <i>Liocichla phoenicea</i>       | Red-faced Liocichla              | Least Concern |
| 73 | Animalia | Leiothrichidae | <i>Mesia argentauris</i>         | Silver-eared Mesia               | Least Concern |
| 74 | Animalia | Leiothrichidae | <i>Minla ignotincta</i>          | Red-tailed Minla                 | Least Concern |
| 75 | Animalia | Leiothrichidae | <i>Sibia nipalensis</i>          | Hoary-throated Barwing           | Least Concern |
| 76 | Animalia | Leiothrichidae | <i>Siva cyanouoptera</i>         | Blue-winged Siva                 | Least Concern |
| 77 | Animalia | Leiothrichidae | <i>Siva strigula</i>             | Bar-throated Siva                | Least Concern |

## Electronic Supplementary Material.

|     |          |                  |                                  |                               |               |
|-----|----------|------------------|----------------------------------|-------------------------------|---------------|
| 78  | Animalia | Leiotrichidae    | <i>Trochalopteron lineatum</i>   | Streaked Laughingthrush       | Least Concern |
| 79  | Animalia | Locustellidae    | <i>Bradypterus luteoventris</i>  | Brown Bush Warbler            | Least Concern |
| 80  | Animalia | Malacothrothidae | <i>Malaconothrus geminus</i>     |                               | Not Assessed  |
| 81  | Animalia | Megalaimidae     | <i>Megalaima virens</i>          | Great Barbet                  | Least Concern |
| 82  | Animalia | Megalaimidae     | <i>Psilopogon asiaticus</i>      | Blue-throated Barbet          | Least Concern |
| 83  | Animalia | Megalaimidae     | <i>Psilopogon franklinii</i>     | Golden-throated Barbet        | Least Concern |
| 84  | Animalia | Motacillidae     | <i>Anthus hodgsoni</i>           | Olive-backed Pipit            | Least Concern |
| 85  | Animalia | Motacillidae     | <i>Motacilla cinera</i>          | Grey Wagtail                  | Least Concern |
| 86  | Animalia | Motacillidae     | <i>Motacilla maderaspatensis</i> | White-browed Wagtail          | Least Concern |
| 87  | Animalia | Muscicapidae     | <i>Anthipes monileger</i>        | White-gorgeted Flycatcher     | Least Concern |
| 88  | Animalia | Muscicapidae     | <i>Cinclidium frontale</i>       | Blue-fronted Robin            | Least Concern |
| 89  | Animalia | Muscicapidae     | <i>Copsychus saularis</i>        | Oriental Magpie-robin         | Least Concern |
| 90  | Animalia | Muscicapidae     | <i>Cyornis rubeculoides</i>      | Blue-throated Blue Flycatcher | Least Concern |
| 91  | Animalia | Muscicapidae     | <i>Cyornis unicolor</i>          | Pale Blue Flycatcher          | Least Concern |
| 92  | Animalia | Muscicapidae     | <i>Enicurus maculatus</i>        | Spotted Forktail              | Least Concern |
| 93  | Animalia | Muscicapidae     | <i>Enicurus scouleri</i>         | Little Forktail               | Least Concern |
| 94  | Animalia | Muscicapidae     | <i>Eumyias thalassina</i>        | Verditer Flycatcher           | Least Concern |
| 95  | Animalia | Muscicapidae     | <i>Ficedula hodgsoni</i>         | Pygmy Blue-flycatcher         | Least Concern |
| 96  | Animalia | Muscicapidae     | <i>Ficedula strophiate</i>       | Rufous-gorgeted Flycatcher    | Least Concern |
| 97  | Animalia | Muscicapidae     | <i>Ficedula westermanni</i>      | Little Pied Flycatcher        | Least Concern |
| 98  | Animalia | Muscicapidae     | <i>Monticola cinclorhynchus</i>  | Blue-capped Rock-thrush       | Least Concern |
| 99  | Animalia | Muscicapidae     | <i>Monticola rufiventris</i>     | Chestnut-bellied Rock-thrush  | Least Concern |
| I00 | Animalia | Muscicapidae     | <i>Muscicapa ferruginea</i>      | Ferruginous Flycatcher        | Least Concern |
| I01 | Animalia | Muscicapidae     | <i>Myiomela leucura</i>          | White-tailed Blue Robin       | Least Concern |
| I02 | Animalia | Muscicapidae     | <i>Myophonus caeruleus</i>       | Blue Whistling-thrush         | Least Concern |
| I03 | Animalia | Muscicapidae     | <i>Niltava grandis</i>           | Large Niltava                 | Least Concern |
| I04 | Animalia | Muscicapidae     | <i>Niltava macgrigoriae</i>      | Small Niltava                 | Least Concern |
| I05 | Animalia | Muscicapidae     | <i>Niltava sundara</i>           | Rufous-bellied Niltava        | Least Concern |
| I06 | Animalia | Muscicapidae     | <i>Phoenicurus frontalis</i>     | Blue-fronted Redstart         | Least Concern |
| I07 | Animalia | Muscicapidae     | <i>Phoenicurus leucocephalus</i> | White-capped Water Redstart   | Least Concern |
| I08 | Animalia | Muscicapidae     | <i>Rhyacornis fuliginosa</i>     | Plumbeous Water Redstart      | Least Concern |
| I09 | Animalia | Muscicapidae     | <i>Saxicola ferreus</i>          | Grey Bushchat                 | Least Concern |
| I10 | Animalia | Muscicapidae     | <i>Tarsiger chrysaeus</i>        | Golden Bush-robin             | Least Concern |
| I11 | Animalia | Muscicapidae     | <i>Tarsiger hyperythrus</i>      | Rufous-breasted Bush-robin    | Least Concern |
| I12 | Animalia | Muscicapidae     | <i>Tarsiger rufilatus</i>        | Himalayan Bluetail            | Least Concern |
| I13 | Animalia | Nectariniidae    | <i>Aethopyga gouldiae</i>        | Mrs. Gould's Sunbird          | Least Concern |
| I14 | Animalia | Nectariniidae    | <i>Aethopyga saturata</i>        | Black-throated Sunbird        | Least Concern |
| I15 | Animalia | Nectariniidae    | <i>Aethopyga siparaja</i>        | Crimson Sunbird               | Least Concern |
| I16 | Animalia | Nectariniidae    | <i>Arachnothera magna</i>        | Streaked Spiderhunter         | Least Concern |
| I17 | Animalia | Oriolidae        | <i>Oriolus traillii</i>          | Maroon Oriole                 | Least Concern |
| I18 | Animalia | Paridae          | <i>Parus monticolus</i>          | Green-backed Tit              | Least Concern |
| I19 | Animalia | Paridae          | <i>Parus spilonotus</i>          | Yellow-cheeked Tit            | Least Concern |

## Electronic Supplementary Material.

|     |          |                   |                                    |                                  |               |
|-----|----------|-------------------|------------------------------------|----------------------------------|---------------|
| I20 | Animalia | Paridae           | <i>Sylviparus modestus</i>         | Yellow-browed Tit                | Least Concern |
| I21 | Animalia | Passeridae        | <i>Passer domesticus</i>           | House Sparrow                    | Least Concern |
| I22 | Animalia | Passeridae        | <i>Passer rutilans</i>             | Russet Sparrow                   | Least Concern |
| I23 | Animalia | Pellorneidae      | <i>Pseudominla castaneiceps</i>    | Rufous-winged Fulvetta           | Least Concern |
| I24 | Animalia | Phalacrocoracidae | <i>Phalacrocorax carbo</i>         | Great Cormorant                  | Least Concern |
| I25 | Animalia | Phasianidae       | <i>Lophura leucomelanos</i>        | Kalij Pheasant                   | Least Concern |
| I26 | Animalia | Phthiracaridae    | <i>Hoplophthiracarus punctatus</i> |                                  | Not Assessed  |
| I27 | Animalia | Phylloscopidae    | <i>Phylloscopus affinis</i>        | Tickell's Leaf-warbler           | Least Concern |
| I28 | Animalia | Phylloscopidae    | <i>Phylloscopus chloronotus</i>    | Lemon-rumped Leaf-warbler        | Least Concern |
| I29 | Animalia | Phylloscopidae    | <i>Phylloscopus maculipennis</i>   | Ashy-throated Warbler            | Least Concern |
| I30 | Animalia | Phylloscopidae    | <i>Phylloscopus pulcher</i>        | Buff-barred Warbler              | Least Concern |
| I31 | Animalia | Phylloscopidae    | <i>Phylloscopus reguloides</i>     | Blyth's Leaf-warbler             | Least Concern |
| I32 | Animalia | Phylloscopidae    | <i>Phylloscopus xanthoschistos</i> | Grey-hooded Warbler              | Least Concern |
| I33 | Animalia | Phylloscopidae    | <i>Seicercus whistleri</i>         | Whistler's Warbler               | Least Concern |
| I34 | Animalia | Picidae           | <i>Blythipicus pyrrhotis</i>       | Bay Woodpecker                   | Least Concern |
| I35 | Animalia | Picidae           | <i>Dryobates cathpharius</i>       | Crimson-breasted Woodpecker      | Least Concern |
| I36 | Animalia | Picidae           | <i>Picumnus innominatus</i>        | Speckled Piculet                 | Least Concern |
| I37 | Animalia | Picidae           | <i>Picus chlorolophus</i>          | Lesser Yellownape                | Least Concern |
| I38 | Animalia | Picidae           | <i>Picus flacinucha</i>            | Greater Yellownape               | Least Concern |
| I39 | Animalia | Picidae           | <i>Sasia ochracea</i>              | White-browed Piculet             | Least Concern |
| I40 | Animalia | Picidae           | <i>Yungipicus canicapillus</i>     | Grey-capped Pygmy Woodpecker     | Least Concern |
| I41 | Animalia | Pnoepygidae       | <i>Pnoepyga pusilla</i>            | Pygmy Cupwing                    | Least Concern |
| I42 | Animalia | Podicipedidae     | <i>Tachybaptus ruficollis</i>      | Little Grebe                     | Least Concern |
| I43 | Animalia | Podicipedidae     | <i>Podiceps nigricollis</i>        | Black-necked Grebe               | Least Concern |
| I44 | Animalia | Prunellidae       | <i>Prunella strophiatea</i>        | Rufous-breasted Accentor         | Least Concern |
| I45 | Animalia | Pycnonotidae      | <i>Hypsipetes leucocephalus</i>    | Black Bulbul                     | Least Concern |
| I46 | Animalia | Pycnonotidae      | <i>Ixos mccllellandii</i>          | Mountain Bulbul                  | Least Concern |
| I47 | Animalia | Pycnonotidae      | <i>Pycnonotus cafer</i>            | Red-vented Bulbul                | Least Concern |
| I48 | Animalia | Pycnonotidae      | <i>Pycnonotus striatus</i>         | Striated Bulbul                  | Least Concern |
| I49 | Animalia | Rallidae          | <i>Amauornis phoenicurus</i>       | White-breasted Waterhen          | Least Concern |
| I50 | Animalia | Rallidae          | <i>Porzana bicolor</i>             | Black-tailed Crake               | Least Concern |
| I51 | Animalia | Rhipiduridae      | <i>Rhipidura albicollis</i>        | White-throated Fantail           | Least Concern |
| I52 | Animalia | Sittidae          | <i>Sitta cinnamoventris</i>        | Chestnut-bellied Nuthatch        | Least Concern |
| I53 | Animalia | Sittidae          | <i>Sitta himalayensis</i>          | White-tailed Nuthatch            | Least Concern |
| I54 | Animalia | Stenostiridae     | <i>Chelidorhynchus hypoxantha</i>  | Yellow-bellied Fantail           | Least Concern |
| I55 | Animalia | Strigidae         | <i>Glaucidium cuculoides</i>       | Asian Barred Owlet               | Least Concern |
| I56 | Animalia | Sturnidae         | <i>Acridotheres tristis</i>        | Indian Myna                      | Least Concern |
| I57 | Animalia | Timaliidae        | <i>Cyanoderma ruficeps</i>         | Rufous-capped Babbler            | Least Concern |
| I58 | Animalia | Timaliidae        | <i>Mixornis gularis</i>            | Pin-striped Tit-babbler          | Least Concern |
| I59 | Animalia | Timaliidae        | <i>Pomatorhinus ruficollis</i>     | Streak-breasted Scimitar-babbler | Least Concern |

## Electronic Supplementary Material.

|     |            |                   |                                   |                                 |               |
|-----|------------|-------------------|-----------------------------------|---------------------------------|---------------|
| 160 | Animalia   | Timaliidae        | <i>Pomatorhinus superciliaris</i> | Slender-billed Scimitar-babbler | Least Concern |
| 161 | Animalia   | Timaliidae        | <i>Satchyris nigriceps</i>        | Grey-throated Babbler           | Least Concern |
| 162 | Animalia   | Turdidae          | <i>Turdus unicolor</i>            | Tickell's Thrush                | Least Concern |
| 163 | Animalia   | Turdidae          | <i>Turdus boulboul</i>            | Grey-winged Blackbird           | Least Concern |
| 164 | Animalia   | Turdidae          | <i>Zoothera dauma</i>             | Scaly Thrush                    | Least Concern |
| 165 | Animalia   | Vangidae          | <i>Hemipus picatus</i>            | Bar-winged Flycatcher-shrike    | Least Concern |
| 166 | Animalia   | Vireonidae        | <i>Erpornis zantholeuca</i>       | White-bellied Erpornis          | Least Concern |
| 167 | Animalia   | Vireonidae        | <i>Pteruthius melanotis</i>       | Black-eared Shrike-babbler      | Least Concern |
| 168 | Animalia   | Zosteropidae      | <i>Yuhina flavicollis</i>         | Whiskered Yuhina                | Least Concern |
| 169 | Animalia   | Zosteropidae      | <i>Yuhina gularis</i>             | Stripe-throated Yuhina          | Least Concern |
| 170 | Animalia   | Zosteropidae      | <i>Yuhina nigrimenta</i>          | Black-chinned Yuhina            | Least Concern |
| 171 | Animalia   | Zosteropidae      | <i>Yuhina occipitalis</i>         | Rufous-vented Yuhina            | Least Concern |
| 172 | Animalia   | Zosteropidae      | <i>Zosterops palpebrosus</i>      | Oriental White-eye              | Least Concern |
| 173 | Chromista  | Achnanthidiaceae  | <i>Eucoconois laevis</i>          |                                 | Not Assessed  |
| 174 | Chromista  | Achnanthidiaceae  | <i>Psammothidium marginulatum</i> |                                 | Not Assessed  |
| 175 | Chromista  | Amphipleuraceae   | <i>Frustulia rhomboides</i>       |                                 | Not Assessed  |
| 176 | Chromista  | Bacillariaceae    | <i>Nitzschia paleacea</i>         |                                 | Not Assessed  |
| 177 | Chromista  | Claucomidae       | <i>Colpoda inflata</i>            |                                 | Not Assessed  |
| 178 | Chromista  | Cymbellaceae      | <i>Cymbella orientalis</i>        |                                 | Not Assessed  |
| 179 | Chromista  | Cymbellaceae      | <i>Kurtkrammeria aequalis</i>     |                                 | Not Assessed  |
| 180 | Chromista  | Eunotiaceae       | <i>Eunotia inflata</i>            |                                 | Not Assessed  |
| 181 | Chromista  | Eunotiaceae       | <i>Eunotia praeupta</i>           |                                 | Not Assessed  |
| 182 | Chromista  | Euplotidae        | <i>Euplotes encysticus</i>        |                                 | Not Assessed  |
| 183 | Chromista  | Gomphonemataceae  | <i>Encyonema minutum</i>          |                                 | Not Assessed  |
| 184 | Chromista  | Gomphonemataceae  | <i>Encyonema silesiacum</i>       |                                 | Not Assessed  |
| 185 | Chromista  | Gomphonemataceae  | <i>Encyonema truncatum</i>        |                                 | Not Assessed  |
| 186 | Chromista  | Gomphonemataceae  | <i>Gomphonema affine</i>          |                                 | Not Assessed  |
| 187 | Chromista  | Gomphonemataceae  | <i>Gomphonema truncatum</i>       |                                 | Not Assessed  |
| 188 | Chromista  | Oxytrichidae      | <i>Laurentiella strenua</i>       |                                 | Not Assessed  |
| 189 | Chromista  | Oxytrichidae      | <i>Notohymena antarctica</i>      |                                 | Not Assessed  |
| 190 | Chromista  | Oxytrichidae      | <i>Oxytricha longigranulosa</i>   |                                 | Not Assessed  |
| 191 | Chromista  | Oxytrichidae      | <i>Pseudouroleptus caudatum</i>   |                                 | Not Assessed  |
| 192 | Chromista  | Oxytrichidae      | <i>Rigidohymena tetracirrata</i>  |                                 | Not Assessed  |
| 193 | Chromista  | Oxytrichidae      | <i>Steinia sphagnicola</i>        |                                 | Not Assessed  |
| 194 | Chromista  | Oxytrichidae      | <i>Sterkiella cavicola</i>        |                                 | Not Assessed  |
| 195 | Chromista  | Pinnulariaceae    | <i>Pinnularia appendiculata</i>   |                                 | Not Assessed  |
| 196 | Chromista  | Pinnulariaceae    | <i>Pinnularia microstauron</i>    |                                 | Not Assessed  |
| 197 | Chromista  | Stephanodiscaceae | <i>Cyclotella glomerata</i>       |                                 | Not Assessed  |
| 198 | Chromista  | Stephanodiscaceae | <i>Discosella stelligera</i>      |                                 | Not Assessed  |
| 199 | Chromista  | Tabellariaceae    | <i>Tabellaria flocculosa</i>      |                                 | Not Assessed  |
| 200 | Chromista  | Vacuolariaceae    | <i>Gonyosomum affine</i>          |                                 | Not Assessed  |
| 201 | Eubacteria | Microcystaceae    | <i>Microcystis aeruginosa</i>     |                                 | Not Assessed  |

## Electronic Supplementary Material.

|     |            |                 |                                  |                          |               |
|-----|------------|-----------------|----------------------------------|--------------------------|---------------|
| 202 | Eubacteria | Rivulariaceae   | <i>Calothrix fusca</i>           |                          | Not Assessed  |
| 203 | Fungae     | Agaricaceae     | <i>Lycoperdon perlatum</i>       | Common Puffball          | Not Assessed  |
| 204 | Fungae     | Cladoniaceae    | <i>Cladonia fenestralis</i>      | Reindeer Lichen          | Not Assessed  |
| 205 | Fungae     | Helvellaceae    | <i>Helvella elastica</i>         | Elastic Saddle Fungus    | Not Assessed  |
| 206 | Fungae     | Hypoxidaceae    | <i>Daldinia concentrica</i>      | King Alfred's Cake       | Not Assessed  |
| 207 | Fungae     | Parmeliaceae    | <i>Hypotrachyna koyaensis</i>    | Hypotrachyna Lichen      | Not Assessed  |
| 208 | Fungae     | Parmeliaceae    | <i>Parmotrema mellissii</i>      | Melliss' Ruffle Lichen   | Not Assessed  |
| 209 | Fungae     | Physalacriaceae | <i>Flammulina velutipes</i>      | Velvet Foot              | Not Assessed  |
| 210 | Fungae     | Physalacriaceae | <i>Oudemansiella mucida</i>      | Porcelain Fungus         | Not Assessed  |
| 211 | Fungae     | Psathyrellaceae | <i>Coprinellus disseminatus</i>  | Fairy Inkcap             | Not Assessed  |
| 212 | Fungae     | Russulaceae     | <i>Lactarius byssaceus</i>       | Threading Milkcap        | Not Assessed  |
| 213 | Fungae     | Russulaceae     | <i>Lactarius elaioviscidus</i>   | Sticky-comb Milkcap      | Not Assessed  |
| 214 | Fungae     | Russulaceae     | <i>Lactarius ermineus</i>        | Matted-white Milkcap     | Not Assessed  |
| 215 | Fungae     | Russulaceae     | <i>Lactifluus dissitus</i>       | Scattering Milkcap       | Not Assessed  |
| 216 | Fungae     | Russulaceae     | <i>Lactifluus piperatus</i>      | Blancaccio               | Not Assessed  |
| 217 | Fungae     | Russulaceae     | <i>Russula albonigra</i>         | Menthol Brittlegill      | Not Assessed  |
| 218 | Fungae     | Russulaceae     | <i>Russula dubdiana</i>          | Dubdi Brittlegill        | Not Assessed  |
| 219 | Fungae     | Russulaceae     | <i>Russula nigricans</i>         | Blackening Brittlegill   | Not Assessed  |
| 220 | Fungae     | Russulaceae     | <i>Russula senecis</i>           | Seneca Brittlegill       | Not Assessed  |
| 221 | Fungae     | Strophariaceae  | <i>Kuehneromyces mutabilis</i>   | Sheathed Woodtuft        | Not Assessed  |
| 222 | Fungae     | Trichocomaceae  | <i>Trichoeoma paradoxa</i>       | Paradox Matsuke          | Not Assessed  |
| 223 | Plantae    | Acanthaceae     | <i>Asystasia macrocarpa</i>      | Large-fruited Coromandel | Not Assessed  |
| 224 | Plantae    | Acanthaceae     | <i>Thunbergia lutea</i>          | Sikkim Clock Vine        | Not Assessed  |
| 225 | Plantae    | Acanthaceae     | <i>Eranthemum indicum</i>        | Indian Sage              | Not Assessed  |
| 226 | Plantae    | Acoraceae       | <i>Acorus calamus</i>            | Sweet Flag               | Least Concern |
| 227 | Plantae    | Adoxaceae       | <i>Sambucus adnata</i>           | East Himalayan Elder     | Not Assessed  |
| 228 | Plantae    | Adoxaceae       | <i>Sambucus canadensis</i>       | American Elder           | Not Assessed  |
| 229 | Plantae    | Adoxaceae       | <i>Sambucus wightiana</i>        | Kashmir Elder            | Not Assessed  |
| 230 | Plantae    | Adoxaceae       | <i>Viburnum cordifolium</i>      | Heart-leaf Viburnum      | Not Assessed  |
| 231 | Plantae    | Adoxaceae       | <i>Viburnum cylindricum</i>      | Cylindrical Viburnum     | Not Assessed  |
| 232 | Plantae    | Adoxaceae       | <i>Viburnum erubescens</i>       | Red Viburnum             | Not Assessed  |
| 233 | Plantae    | Amaranthaceae   | <i>Achranthes bidentata</i>      | Ox Knee                  | Not Assessed  |
| 234 | Plantae    | Amaranthaceae   | <i>Amaranthus spinosus</i>       | Spiny Amaranth           | Not Assessed  |
| 235 | Plantae    | Amaryllidaceae  | <i>Zephyranthes carinata</i>     | Rosepink Zephyr Lily     | Not Assessed  |
| 236 | Plantae    | Amphorogynaceae | <i>Dendrotrophe granulata</i>    | Grainseed Mistletoe      | Not Assessed  |
| 237 | Plantae    | Anacardiaceae   | <i>Rhus chinensis</i>            | Chinese Sumac            | Least Concern |
| 238 | Plantae    | Anacardiaceae   | <i>Toxicodendron succedaneum</i> | Japanese Wax Tree        | Least Concern |
| 239 | Plantae    | Anacardiaceae   | <i>Toxicodendron hookeri</i>     | Hooker's Sumac           | Not Assessed  |
| 240 | Plantae    | Apiaceae        | <i>Centella asiatica</i>         | Asiatic Pennywort        | Least Concern |
| 241 | Plantae    | Apiaceae        | <i>Oenanthe thomsoni</i>         | Thomson's Water Dropwort | Not Assessed  |
| 242 | Plantae    | Apiaceae        | <i>Sanicula elata</i>            | Eurasian Sanicle         | Not Assessed  |
| 243 | Plantae    | Apocynaceae     | <i>Hoya fusca</i>                | Thin-leaf Wax Plant      | Not Assessed  |
| 244 | Plantae    | Apocynaceae     | <i>Hoya linearis</i>             | Dusky Wax Plant          | Not Assessed  |

## Electronic Supplementary Material.

|     |         |                 |                                    |                                 |               |
|-----|---------|-----------------|------------------------------------|---------------------------------|---------------|
| 245 | Plantae | Aponogetonaceae | <i>Aponogeton natans</i>           | Floating Lace Plant             | Least Concern |
| 246 | Plantae | Araceae         | <i>Arisaema concinnum</i>          | Chinese Cobra Lily              | Not Assessed  |
| 247 | Plantae | Araceae         | <i>Arisaema costatum</i>           | Costate Cobra Lily              | Not Assessed  |
| 248 | Plantae | Araceae         | <i>Arisaema intermedium</i>        | Intermediate Cobra Lily         | Not Assessed  |
| 249 | Plantae | Araceae         | <i>Remusatia pumila</i>            | Dwarf Hitchhiker Elephant Plant | Not Assessed  |
| 250 | Plantae | Araceae         | <i>Rhaphidophora decursiva</i>     | Creeping Philodendron           | Not Assessed  |
| 251 | Plantae | Araceae         | <i>Rhaphidophora glauca</i>        | White Philodendron              | Not Assessed  |
| 252 | Plantae | Araliaceae      | <i>Hydrocotyle javanica</i>        | Java Pennywort                  | Least Concern |
| 253 | Plantae | Araliaceae      | <i>Aralia leschenaultii</i>        | Leschenault's Spikenard         | Not Assessed  |
| 254 | Plantae | Araliaceae      | <i>Brassaiopsis hainla</i>         | White Chuletro                  | Not Assessed  |
| 255 | Plantae | Asparagaceae    | <i>Maianthemum purpureum</i>       | Purple Mayflower                | Not Assessed  |
| 256 | Plantae | Asparagaceae    | <i>Rohdea nepalensis</i>           | Sacred Lily                     | Not Assessed  |
| 257 | Plantae | Asparagaceae    | <i>Tupistra nutans</i>             | Nakima                          | Not Assessed  |
| 258 | Plantae | Aspleniaceae    | <i>Asplenium gueinzianum</i>       | Gueinz's Spleenwort             | Not Assessed  |
| 259 | Plantae | Aspleniaceae    | <i>Asplenium normale</i>           | Rainforest Spleenwort           | Not Assessed  |
| 260 | Plantae | Aspleniaceae    | <i>Asplenium pellucidum</i>        | Translucent Spleenwort          | Not Assessed  |
| 261 | Plantae | Asteraceae      | <i>Ageratina adenophora</i>        | Croftonweed                     | Not Assessed  |
| 262 | Plantae | Asteraceae      | <i>Ageratum conyzoides</i>         | Billygoat-weed                  | Not Assessed  |
| 263 | Plantae | Asteraceae      | <i>Ainsliaea latifolia</i>         | Broad-leaf Ainsliaea            | Not Assessed  |
| 264 | Plantae | Asteraceae      | <i>Anaphalis contorta</i>          | Pearly Everlasting              | Not Assessed  |
| 265 | Plantae | Asteraceae      | <i>Artemisia vulgaris</i>          | Common Wormwood                 | Not Assessed  |
| 266 | Plantae | Asteraceae      | <i>Bidens biternata</i>            | Yellow-flowered Blackjack       | Not Assessed  |
| 267 | Plantae | Asteraceae      | <i>Bidens pilosa</i>               | Hairy Beggarticks               | Not Assessed  |
| 268 | Plantae | Asteraceae      | <i>Carpesium cernuum</i>           | Nodding Carpesium               | Not Assessed  |
| 269 | Plantae | Asteraceae      | <i>Crassocephalum crepidioides</i> | Redflower Ragleaf               | Not Assessed  |
| 270 | Plantae | Asteraceae      | <i>Dichrocephala integrifolia</i>  | Bicolor Buttonweed              | Not Assessed  |
| 271 | Plantae | Asteraceae      | <i>Erigeron canadensis</i>         | Canadian Horseweed              | Not Assessed  |
| 272 | Plantae | Asteraceae      | <i>Galinsoga parviflora</i>        | Gallant Soldier                 | Not Assessed  |
| 273 | Plantae | Asteraceae      | <i>Gynura nepalensis</i>           | Nepalese Gynura                 | Not Assessed  |
| 274 | Plantae | Asteraceae      | <i>Pseudognaphalium hypoleucum</i> | Cudweed                         | Not Assessed  |
| 275 | Plantae | Asteraceae      | <i>Seriphidium nigricans</i>       | Black Mugwort                   | Not Assessed  |
| 276 | Plantae | Asteraceae      | <i>Synotis cappa</i>               | Cloaked Senecio                 | Not Assessed  |
| 277 | Plantae | Athyriaceae     | <i>Athyrium himalaicum</i>         | Himalayan Lady Fern             | Not Assessed  |
| 278 | Plantae | Athyriaceae     | <i>Diplazium doederleinii</i>      | Doederlein's Vegetable Fern     | Not Assessed  |
| 279 | Plantae | Athyriaceae     | <i>Diplazium javanicum</i>         | Javan Vegetable Fern            | Not Assessed  |
| 280 | Plantae | Balsaminaceae   | <i>Impatiens arguta</i>            | East Himalayan Balsam           | Not Assessed  |
| 281 | Plantae | Balsaminaceae   | <i>Impatiens drepanophora</i>      | Sickle-bearing Balsam           | Not Assessed  |
| 282 | Plantae | Balsaminaceae   | <i>Impatiens radiata</i>           | Spreading Rays Balsam           | Not Assessed  |
| 283 | Plantae | Balsaminaceae   | <i>Impatiens stenantha</i>         | Hardy Balsam                    | Not Assessed  |
| 284 | Plantae | Begoniaceae     | <i>Begonia cathariensis</i>        | Cather Begonia                  | Not Assessed  |
| 285 | Plantae | Berberidaceae   | <i>Berberis asiatica</i>           | Asian Barberry                  | Not Assessed  |
| 286 | Plantae | Berberidaceae   | <i>Berberis wallichiana</i>        | Wallich's Barberry              | Not Assessed  |



## Electronic Supplementary Material.

|     |         |                  |                                  |                        |                |
|-----|---------|------------------|----------------------------------|------------------------|----------------|
| 287 | Plantae | Berberidaceae    | <i>Holboellia latifolia</i>      | Ritak Sausage Vine     | Not Assessed   |
| 288 | Plantae | Betulaceae       | <i>Alnus nepalensis</i>          | Nepal Black Cedar      | Least Concern  |
| 289 | Plantae | Betulaceae       | <i>Betula alnoides</i>           | Himalayan Birch        | Least Concern  |
| 290 | Plantae | Boraginaceae     | <i>Cynoglossum wallichii</i>     | Prickly Hound's Tongue | Not Assessed   |
| 291 | Plantae | Boraginaceae     | <i>Cynoglossum zeylanicum</i>    | Ceylon Forget-me-not   | Not Assessed   |
| 292 | Plantae | Boraginaceae     | <i>Ehretia wallichiana</i>       | Wallich's Ehretia      | Not Assessed   |
| 293 | Plantae | Botryococcaceae  | <i>Botryococcus braunii</i>      | Braun's Green Alga     | Not Assessed   |
| 294 | Plantae | Brassicaceae     | <i>Nasturtium officinale</i>     | Water-cress            | Least Concern  |
| 295 | Plantae | Burseraceae      | <i>Garuga floribunda</i>         | Garuga                 | Least Concern  |
| 296 | Plantae | Campanulaceae    | <i>Lobelia angulata</i>          | Angled Lobelia         | Not Assessed   |
| 297 | Plantae | Caprifoliaceae   | <i>Drymaria cordata</i>          | Tropical Chickweed     | Not Assessed   |
| 298 | Plantae | Carlemanniaceae  | <i>Carlemannia congesta</i>      | Crowding Carlemannia   | Not Assessed   |
| 299 | Plantae | Caryophyllaceae  | <i>Lonicera glabrata</i>         | Himalayan Honeysuckle  | Not Assessed   |
| 300 | Plantae | Caryophyllaceae  | <i>Stellaria media</i>           | Chickweed              | Not Assessed   |
| 301 | Plantae | Ceratophyllaceae | <i>Ceratophyllum demersum</i>    | Rigid Hornwort         | Least Concern  |
| 302 | Plantae | Closteriaceae    | <i>Closterium abruptum</i>       |                        | Not Assessed   |
| 303 | Plantae | Closteriaceae    | <i>Closterium arcuarium</i>      |                        | Not Assessed   |
| 304 | Plantae | Closteriaceae    | <i>Closterium cynthia</i>        |                        | Not Assessed   |
| 305 | Plantae | Closteriaceae    | <i>Closterium ehrenbergii</i>    |                        | Not Assessed   |
| 306 | Plantae | Closteriaceae    | <i>Closterium gracile</i>        |                        | Not Assessed   |
| 307 | Plantae | Closteriaceae    | <i>Closterium libellula</i>      |                        | Not Assessed   |
| 308 | Plantae | Closteriaceae    | <i>Closterium oblongum</i>       |                        | Not Assessed   |
| 309 | Plantae | Closteriaceae    | <i>Closterium striolatum</i>     |                        | Not Assessed   |
| 310 | Plantae | Commelinaceae    | <i>Commelina paludosa</i>        | Swamp Dayflower        | Not Assessed   |
| 311 | Plantae | Commelinaceae    | <i>Cyanotis vaga</i>             | Wandering Kitten Ears  | Not Assessed   |
| 312 | Plantae | Cucurbitaceae    | <i>Gymnopetalum chinense</i>     | Balsam Pear            | Not Assessed   |
| 313 | Plantae | Cucurbitaceae    | <i>Trichosanthes lepiniana</i>   | Snake Gourd            | Not Assessed   |
| 314 | Plantae | Cupressaceae     | <i>Cryptomeria japonica</i>      | Japanese Cedar         | Not Threatened |
| 315 | Plantae | Cyatheaceae      | <i>Cyathea spinulosa</i>         | Spiny Tree Fern        | Not Assessed   |
| 316 | Plantae | Cyperaceae       | <i>Actinoscirpus grossus</i>     | Giant Bur Rush         | Least Concern  |
| 317 | Plantae | Cyperaceae       | <i>Carex filicina</i>            | Fern Sedge             | Least Concern  |
| 318 | Plantae | Cyperaceae       | <i>Fimbristylis schoenoides</i>  | Ditch Fimbry           | Least Concern  |
| 319 | Plantae | Cyperaceae       | <i>Kyllinga brevifolia</i>       | Shortleaf Spikesedge   | Least Concern  |
| 320 | Plantae | Cyperaceae       | <i>Carex eleusinoides</i>        | Goosegrass Sedge       | Not Assessed   |
| 321 | Plantae | Cyperaceae       | <i>Carex insignis</i>            | Conspicuous Sedge      | Not Assessed   |
| 322 | Plantae | Dennstaedtiaceae | <i>Dennstaedtia scabra</i>       | Flakey Hayscented Fern | Not Assessed   |
| 323 | Plantae | Dennstaedtiaceae | <i>Hypolepsis punctata</i>       | Pointed Beadfern       | Not Assessed   |
| 324 | Plantae | Dennstaedtiaceae | <i>Lemmaphyllum rostratum</i>    | Curved Pennyfern       | Not Assessed   |
| 325 | Plantae | Dennstaedtiaceae | <i>Monachosorum subdigitatum</i> | Small Tail-leaf Fern   | Not Assessed   |
| 326 | Plantae | Desmidiaceae     | <i>Actinotaenium cucurbita</i>   |                        | Not Assessed   |
| 327 | Plantae | Desmidiaceae     | <i>Arthrodesmus convergens</i>   |                        | Not Assessed   |
| 328 | Plantae | Desmidiaceae     | <i>Cosmarium biretum</i>         |                        | Not Assessed   |

## Electronic Supplementary Material.

|     |         |                 |                                   |                                |                 |
|-----|---------|-----------------|-----------------------------------|--------------------------------|-----------------|
| 329 | Plantae | Desmidiaceae    | <i>Cosmarium connatum</i>         |                                | Not Assessed    |
| 330 | Plantae | Desmidiaceae    | <i>Cosmarium cycladatum</i>       |                                | Not Assessed    |
| 331 | Plantae | Desmidiaceae    | <i>Cosmarium cymatopleurum</i>    |                                | Not Assessed    |
| 332 | Plantae | Desmidiaceae    | <i>Cosmarium difficile</i>        |                                | Not Assessed    |
| 333 | Plantae | Desmidiaceae    | <i>Cosmarium hammeri</i>          |                                | Not Assessed    |
| 334 | Plantae | Desmidiaceae    | <i>Cosmarium laeve</i>            |                                | Not Assessed    |
| 335 | Plantae | Desmidiaceae    | <i>Cosmarium moniliforme</i>      |                                | Not Assessed    |
| 336 | Plantae | Desmidiaceae    | <i>Cosmarium phaseolus</i>        |                                | Not Assessed    |
| 337 | Plantae | Desmidiaceae    | <i>Cosmarium quadrum</i>          |                                | Not Assessed    |
| 338 | Plantae | Desmidiaceae    | <i>Cosmarium sinostegos</i>       |                                | Not Assessed    |
| 339 | Plantae | Desmidiaceae    | <i>Desmidium aptogonum</i>        |                                | Not Assessed    |
| 340 | Plantae | Desmidiaceae    | <i>Hyalotheca dissiliens</i>      |                                | Not Assessed    |
| 341 | Plantae | Desmidiaceae    | <i>Micrasterias pinnatifida</i>   |                                | Not Assessed    |
| 342 | Plantae | Desmidiaceae    | <i>Xanthidium acathophorum</i>    |                                | Not Assessed    |
| 343 | Plantae | Desmodesmoideae | <i>Desmodesmus microspina</i>     |                                | Not Assessed    |
| 344 | Plantae | Dryopteridaceae | <i>Arachniodes coniiifolia</i>    | Cone-leaf Holly Fern           | Not Assessed    |
| 345 | Plantae | Dryopteridaceae | <i>Dryopteris cochleata</i>       | Spiral Wood Fern               | Not Assessed    |
| 346 | Plantae | Dryopteridaceae | <i>Elaphoglossum marginatum</i>   | Marginal Tongue Fern           | Not Assessed    |
| 347 | Plantae | Dryopteridaceae | <i>Polystichum lactum</i>         | Milky Holly Fern               | Not Assessed    |
| 348 | Plantae | Dryopteridaceae | <i>Polystichum lentum</i>         | Marsh Sword Fern               | Not Assessed    |
| 349 | Plantae | Eleocarpaceae   | <i>Elaeocarpus lanceifolius</i>   | Lance-leaf Marble Tree         | Not Assessed    |
| 350 | Plantae | Equisetaceae    | <i>Equisetum debele</i>           | Frail Horsetail                | Not Assessed    |
| 351 | Plantae | Equisetaceae    | <i>Equisetum diffusum</i>         | Himalayan Horsetail            | Not Assessed    |
| 352 | Plantae | Ericaceae       | <i>Agapetes hookeri</i>           | Hooker's Lantern               | Not Assessed    |
| 353 | Plantae | Ericaceae       | <i>Agapetes serpens</i>           | Himalayan Lantern              | Not Assessed    |
| 354 | Plantae | Ericaceae       | <i>Gaultheria fragrantissima</i>  | Fragrant Wintergreen           | Not Assessed    |
| 355 | Plantae | Ericaceae       | <i>Lyonia ovalifolia</i>          | Fetterbush                     | Least Concern   |
| 356 | Plantae | Ericaceae       | <i>Rhododendron arboreum</i>      | Tree Rhododendron              | Least Concern   |
| 357 | Plantae | Ericaceae       | <i>Rhododendron dalhousiae</i>    | Lady Dalhousie<br>Rhododendron | Not Assessed    |
| 358 | Plantae | Ericaceae       | <i>Rhododendron griffithianum</i> | Griffith's Rhododendron        | Not Assessed    |
| 359 | Plantae | Ericaceae       | <i>Vaccinium dunalianum</i>       | Dunal's Blueberry              | Least Concern   |
| 360 | Plantae | Ericaceae       | <i>Vaccinium nummularia</i>       | Coin Whortleberry              | Not Assessed    |
| 361 | Plantae | Ericaceae       | <i>Vaccinium vacciniaceum</i>     | Tibetan Blueberry              | Not Assessed    |
| 362 | Plantae | Euphorbiaceae   | <i>Mallotus philippensis</i>      | Kamala Tree                    | Least Concern   |
| 363 | Plantae | Fabaceae        | <i>Acrocarpus fraxinifolius</i>   | Shingle Tree                   | Not Assessed    |
| 364 | Plantae | Fabaceae        | <i>Bauhinia vahlii</i>            | Malu Creeper                   | Not Assessed    |
| 365 | Plantae | Fabaceae        | <i>Desmodium multiflorum</i>      | Many-flowered Desmodium        | Not Assessed    |
| 366 | Plantae | Fabaceae        | <i>Indigofera dosua</i>           | Dousa's Indigo                 | Not Assessed    |
| 367 | Plantae | Fabaceae        | <i>Indigofera tomentosa</i>       | Hairy Indigo                   | Near Threatened |
| 368 | Plantae | Fabaceae        | <i>Vicia hirsuta</i>              | Tiny Vetch                     | Not Assessed    |
| 369 | Plantae | Fagaceae        | <i>Castanopsis hystrix</i>        | Patale Chestnut                | Not Assessed    |
| 370 | Plantae | Fagaceae        | <i>Castanopsis tribuloides</i>    | Musure Chestnut                | Not Assessed    |

## Electronic Supplementary Material.

|     |         |                  |                                   |                          |               |
|-----|---------|------------------|-----------------------------------|--------------------------|---------------|
| 371 | Plantae | Fagaceae         | <i>Lithocarpus elegans</i>        | Elegant Tanbark Oak      | Not Assessed  |
| 372 | Plantae | Fagaceae         | <i>Lithocarpus pachyphyllus</i>   | Thick-leaf Tanbark Oak   | Not Assessed  |
| 373 | Plantae | Fagaceae         | <i>Quercus fenestrata</i>         | Arkholo Oak              | Not Assessed  |
| 374 | Plantae | Fagaceae         | <i>Quercus lamellosa</i>          | Bull Oak                 | Not Assessed  |
| 375 | Plantae | Fagaceae         | <i>Quercus lineata</i>            | Phalant Oak              | Not Assessed  |
| 376 | Plantae | Funariaceae      | <i>Funaria hygrometrica</i>       | Common Cord-moss         | Not Assessed  |
| 377 | Plantae | Gentianaceae     | <i>Halenia elliptica</i>          | Spurred Gentian          | Not Assessed  |
| 378 | Plantae | Gentianaceae     | <i>Swertia bimaculata</i>         | Double-spotted Swertia   | Not Assessed  |
| 379 | Plantae | Gentianaceae     | <i>Swertia chirayita</i>          | Chirayita                | Not Assessed  |
| 380 | Plantae | Geraniaceae      | <i>Geranium nepalense</i>         | Nepalese Crane's Bill    | Not Assessed  |
| 381 | Plantae | Gesneriaceae     | <i>Aeschynanthus hookeri</i>      | Hooker's Blushwort       | Not Assessed  |
| 382 | Plantae | Gesneriaceae     | <i>Aeschynanthus micranthus</i>   | Lipstick Plant           | Not Assessed  |
| 383 | Plantae | Gesneriaceae     | <i>Aeschynanthus parviflorus</i>  | Sikkim Blushwort         | Not Assessed  |
| 384 | Plantae | Gesneriaceae     | <i>Didymocarpus hookeri</i>       | Hooker's Stone-flower    | Not Assessed  |
| 385 | Plantae | Gesneriaceae     | <i>Henckelia pumila</i>           | Small Stone-flower       | Not Assessed  |
| 386 | Plantae | Gesneriaceae     | <i>Henckelia urticifolia</i>      | Nettle-leaf Stone-flower | Not Assessed  |
| 387 | Plantae | Gleicheniaceae   | <i>Dicranopteris taiwanensis</i>  | Taiwanese Fork Fern      | Not Assessed  |
| 388 | Plantae | Gleicheniaceae   | <i>Gleichenia gigantea</i>        | Giant Coral Fern         | Not Assessed  |
| 389 | Plantae | Gleicheniaceae   | <i>Gleichenia longissima</i>      | Long Coral Fern          | Not Assessed  |
| 390 | Plantae | Gonatozygaceae   | <i>Gonatozygon aculeatum</i>      |                          | Not Assessed  |
| 391 | Plantae | Gonatozygaceae   | <i>Gonatozygon kinahani</i>       |                          | Not Assessed  |
| 392 | Plantae | Gonatozygaceae   | <i>Gonatozygon monotaenium</i>    |                          | Not Assessed  |
| 393 | Plantae | Hamamelidaceae   | <i>Exbucklandia populnea</i>      | Malayan Aspen            | Least Concern |
| 394 | Plantae | Hormotilaceae    | <i>Heleococcus polyvacuolatus</i> |                          | Not Assessed  |
| 395 | Plantae | Hydrangeaceae    | <i>Dichroa febrifuga</i>          | Blue Evergreen Hydrangea | Not Assessed  |
| 396 | Plantae | Hydrangeaceae    | <i>Hydrangea aspera</i>           | Rough-leaf Hydrangea     | Least Concern |
| 397 | Plantae | Hydrangeaceae    | <i>Hydrangea heteromalla</i>      | Himalayan Hydrangea      | Least Concern |
| 398 | Plantae | Hydrangeaceae    | <i>Hydrangea macrophylla</i>      | Bigleaf Hydrangea        | Not Assessed  |
| 399 | Plantae | Hymenophyllaceae | <i>Hymenophyllum badium</i>       | Yellow Filmy Fern        | Not Assessed  |
| 400 | Plantae | Hypericaceae     | <i>Hypericum dyeri</i>            | Dyer's St. John's Wort   | Not Assessed  |
| 401 | Plantae | Hypericaceae     | <i>Hypericum hookerianum</i>      | Hooker's St. John's Wort | Not Assessed  |
| 402 | Plantae | Hypoxidaceae     | <i>Hypoxis aurea</i>              | Golden Star Grass        | Not Assessed  |
| 403 | Plantae | Juglandaceae     | <i>Engelhardia spicata</i>        | Spiked Engelhardia       | Least Concern |
| 404 | Plantae | Juglandaceae     | <i>Juglans regia</i>              | Persian Walnut           | Least Concern |
| 405 | Plantae | Juncaceae        | <i>Juncus effusus</i>             | Bent Bulrush             | Least Concern |
| 406 | Plantae | Juncaceae        | <i>Juncus inflexus</i>            | European Meadow Rush     | Least Concern |
| 407 | Plantae | Lamiaceae        | <i>Ajuga macrosperma</i>          | Large-seed Bugleweed     | Not Assessed  |
| 408 | Plantae | Lamiaceae        | <i>Clinopodium umbrosum</i>       | Shady Calamint           | Not Assessed  |
| 409 | Plantae | Lamiaceae        | <i>Leucosceptrum canum</i>        | Hairy White-wand         | Not Assessed  |
| 410 | Plantae | Lamiaceae        | <i>Melissa axillaris</i>          | Small-flowered Melissa   | Not Assessed  |
| 411 | Plantae | Lamiaceae        | <i>Phlomoides hamosa</i>          | Wooly Himalayan Spike    | Not Assessed  |
| 412 | Plantae | Lamiaceae        | <i>Plectranthus mollis</i>        | Soft-stem Mintleaf       | Not Assessed  |
| 413 | Plantae | Lauraceae        | <i>Actinodaphne sikkimensis</i>   | Sikkim Paper Plant       | Not Assessed  |

## Electronic Supplementary Material.

|     |         |                  |                                   |                                 |                |
|-----|---------|------------------|-----------------------------------|---------------------------------|----------------|
| 414 | Plantae | Lauraceae        | <i>Beilschmiedia sikkimensis</i>  | Thulo Tarsing                   | Not Assessed   |
| 415 | Plantae | Lauraceae        | <i>Cinnamomum glaucescens</i>     | White Bay                       | Not Assessed   |
| 416 | Plantae | Lauraceae        | <i>Cinnamomum bejolghota</i>      | Mountain Bay                    | Least Concern  |
| 417 | Plantae | Lauraceae        | <i>Cinnamomum impressinervium</i> | Veined Bay                      | Not Assessed   |
| 418 | Plantae | Lauraceae        | <i>Cinnamomum tamala</i>          | Indian Bay                      | Not Assessed   |
| 419 | Plantae | Lauraceae        | <i>Lindera assamica</i>           | Assamese Spicebush              | Not Assessed   |
| 420 | Plantae | Lauraceae        | <i>Litsea cubeba</i>              | Aromatic Litsea                 | Not Assessed   |
| 421 | Plantae | Lauraceae        | <i>Machilus edulis</i>            | Fruiting Bay                    | Not Assessed   |
| 422 | Plantae | Lauraceae        | <i>Machilus odoratissima</i>      | Fragrant Bay                    | Not Assessed   |
| 423 | Plantae | Lejeuneaceae     | <i>Leptolejeunea elliptica</i>    | Elliptical Liverwort            | Not Assessed   |
| 424 | Plantae | Lejeuneaceae     | <i>Leptolejeunea udarii</i>       | Udar's Liverwort                | Not Assessed   |
| 425 | Plantae | Liliaceae        | <i>Streptopus simplex</i>         | Simple Twisted Stalk            | Not Assessed   |
| 426 | Plantae | Linderniaceae    | <i>Torenia violacea</i>           | Violet Wishbone Flower          | Not Assessed   |
| 427 | Plantae | Lindsaeaceae     | <i>Lindsaea odorata</i>           | Pungent Necklace Fern           | Not Assessed   |
| 428 | Plantae | Lindsaeaceae     | <i>Odontosoria chinensis</i>      | Chinese Creepingfern            | Not Assessed   |
| 429 | Plantae | Lindsaeaceae     | <i>Sphenomeris chinensis</i>      | Chinese Lace Fern               | Not Assessed   |
| 430 | Plantae | Loranthaceae     | <i>Scurrula parasitica</i>        | Himalayan Mulberry<br>Mistletoe | Not Assessed   |
| 431 | Plantae | Lycopodiaceae    | <i>Lycopodiella cernua</i>        | Staghorn Clubmoss               | Not Assessed   |
| 432 | Plantae | Lycopodiaceae    | <i>Lycopodium japonicum</i>       | Japanese Clubmoss               | Not Assessed   |
| 433 | Plantae | Magnoliaceae     | <i>Magnolia campbellii</i>        | Campbell's Magnolia             | Least Concern  |
| 434 | Plantae | Magnoliaceae     | <i>Magnolia cathcartii</i>        | Cathcart's Magnolia             | Least Concern  |
| 435 | Plantae | Magnoliaceae     | <i>Magnolia doltsopa</i>          | Sweet Michelia                  | Data Deficient |
| 436 | Plantae | Melanthiaceae    | <i>Paris polyphylla</i>           | Himalayan Paris                 | Not Assessed   |
| 437 | Plantae | Melastomataceae  | <i>Medinilla rubicunda</i>        | Ruddy Medinilla                 | Not Assessed   |
| 438 | Plantae | Melastomataceae  | <i>Melastoma malabathricum</i>    | Indian Rhododendron             | Not Assessed   |
| 439 | Plantae | Melastomataceae  | <i>Osbeckia stellata</i>          | Starry Osbeckia                 | Not Assessed   |
| 440 | Plantae | Melastomataceae  | <i>Oxyspora paniculata</i>        | Bristletips                     | Not Assessed   |
| 441 | Plantae | Melastomataceae  | <i>Sarcopyramis napalensis</i>    | Nepal Sacropyramis              | Not Assessed   |
| 442 | Plantae | Meliaceae        | <i>Toona ciliata</i>              | Mountain Cedar                  | Not Assessed   |
| 443 | Plantae | Menispermaceae   | <i>Cissampelos pareira</i>        | Velvetleaf                      | Not Assessed   |
| 444 | Plantae | Menispermaceae   | <i>Stephania elegans</i>          | Elegant Tape Vine               | Not Assessed   |
| 445 | Plantae | Menispermaceae   | <i>Stephania glabra</i>           | Smooth Tape Vine                | Not Assessed   |
| 446 | Plantae | Mesotaeniaceae   | <i>Cylindrocystis brebissonii</i> |                                 | Not Assessed   |
| 447 | Plantae | Mesotaeniaceae   | <i>Netrium oblongum</i>           |                                 | Not Assessed   |
| 448 | Plantae | Mesotaeniaceae   | <i>Spirotaenia condensata</i>     |                                 | Not Assessed   |
| 449 | Plantae | Microsporaceae   | <i>Microspora amoena</i>          |                                 | Not Assessed   |
| 450 | Plantae | Moraceae         | <i>Ficus auriculata</i>           | Roxburgh Fig                    | Least Concern  |
| 451 | Plantae | Moraceae         | <i>Ficus neriifolia</i>           | Willow-leaf Fig                 | Not Assessed   |
| 452 | Plantae | Moraceae         | <i>Morus indica</i>               | Indian Mulberry                 | Not Assessed   |
| 453 | Plantae | Nephrolepidaceae | <i>Nephrolepis cordifolia</i>     | Narrow Swordfern                | Not Assessed   |
| 454 | Plantae | Nyssaceae        | <i>Nyssa javanica</i>             | Javan Gum                       | Not Assessed   |
| 455 | Plantae | Oleaceae         | <i>Jasminum dispersum</i>         | Pink Jasmine                    | Not Assessed   |

## Electronic Supplementary Material.

|     |         |                 |                                   |                                        |               |
|-----|---------|-----------------|-----------------------------------|----------------------------------------|---------------|
| 456 | Plantae | Oleandraceae    | <i>Oleandra wallichii</i>         | Wallich's Oleander                     | Not Assessed  |
| 457 | Plantae | Oocystaceae     | <i>Nephroclytium varium</i>       |                                        | Not Assessed  |
| 458 | Plantae | Ophioglossaceae | <i>Botrychium virginianum</i>     | Virginian Rattlesnake Fern             | Not Assessed  |
| 459 | Plantae | Orchidaceae     | <i>Bulbophyllum cauliflorum</i>   | Stem-flowering<br>Bulbophyllum         | Least Concern |
| 460 | Plantae | Orchidaceae     | <i>Agrostophyllum callosum</i>    | Himalayan Grass-leaf Orchid            | Not Assessed  |
| 461 | Plantae | Orchidaceae     | <i>Anthogonium gracile</i>        | Slender Anthogonium                    | Not Assessed  |
| 462 | Plantae | Orchidaceae     | <i>Bulbophyllum cylindraceum</i>  | Cylindrical Bulbophyllum               | Not Assessed  |
| 463 | Plantae | Orchidaceae     | <i>Bulbophyllum hirtum</i>        | Bristly Bulbophyllum                   | Not Assessed  |
| 464 | Plantae | Orchidaceae     | <i>Bulbophyllum leopardinum</i>   | Leopard-spotted<br>Bulbophyllum        | Least Concern |
| 465 | Plantae | Orchidaceae     | <i>Bulbophyllum reptans</i>       | Crawling Bulbophyllum                  | Not Assessed  |
| 466 | Plantae | Orchidaceae     | <i>Bulbophyllum wallichii</i>     | Wallich's Bulbophyllum                 | Not Assessed  |
| 467 | Plantae | Orchidaceae     | <i>Bulbophyllum yoksunense</i>    | Yoksum Bulbophyllum                    | Not Assessed  |
| 468 | Plantae | Orchidaceae     | <i>Calanthe alismifolia</i>       | Deathly Christmas Orchid               | Not Assessed  |
| 469 | Plantae | Orchidaceae     | <i>Calanthe biloba</i>            | Two-lobed Christmas<br>Orchid          | Not Assessed  |
| 470 | Plantae | Orchidaceae     | <i>Calanthe densiflora</i>        | Densely-flowered Christmas<br>Orchid   | Not Assessed  |
| 471 | Plantae | Orchidaceae     | <i>Calanthe herbacea</i>          | Herbaceous Christmas<br>Orchid         | Not Assessed  |
| 472 | Plantae | Orchidaceae     | <i>Calanthe puberula</i>          | Hairy Christmas Orchid                 | Not Assessed  |
| 473 | Plantae | Orchidaceae     | <i>Chrysoglossum ornatum</i>      | Golden Cicada Orchid                   | Not Assessed  |
| 474 | Plantae | Orchidaceae     | <i>Coelogyne corymbosa</i>        | Umbrella-like Coelogyne                | Not Assessed  |
| 475 | Plantae | Orchidaceae     | <i>Coelogyne cristata</i>         | Crested Coelogyne                      | Not Assessed  |
| 476 | Plantae | Orchidaceae     | <i>Cryptochilus luteus</i>        | Muddy Cryptochilus                     | Not Assessed  |
| 477 | Plantae | Orchidaceae     | <i>Cymbidium devonianum</i>       | Devon Boat Orchid                      | Not Assessed  |
| 478 | Plantae | Orchidaceae     | <i>Cymbidium longifolium</i>      | Elegant Boat Orchid                    | Not Assessed  |
| 479 | Plantae | Orchidaceae     | <i>Dendrobium amplum</i>          | Black-tongued Dendrobium               | Not Assessed  |
| 480 | Plantae | Orchidaceae     | <i>Dendrobium fuscescens</i>      | Ochre-yellow Dendrobium                | Not Assessed  |
| 481 | Plantae | Orchidaceae     | <i>Dendrobium gibsonii</i>        | Gibson's Dendrobium                    | Not Assessed  |
| 482 | Plantae | Orchidaceae     | <i>Dendrobium hookerianum</i>     | Hooker's Dendrobium                    | Not Assessed  |
| 483 | Plantae | Orchidaceae     | <i>Dendrobium longicornu</i>      | Long-horned Dendrobium                 | Not Assessed  |
| 484 | Plantae | Orchidaceae     | <i>Dendrobium ochreatum</i>       | Ochre Dendrobium                       | Not Assessed  |
| 485 | Plantae | Orchidaceae     | <i>Dendrobium rotundatum</i>      | Rounded Dendrobium                     | Not Assessed  |
| 486 | Plantae | Orchidaceae     | <i>Eria coronaria</i>             | Crown-lipped Eria                      | Not Assessed  |
| 487 | Plantae | Orchidaceae     | <i>Eria excavata</i>              | Caving Eria                            | Not Assessed  |
| 488 | Plantae | Orchidaceae     | <i>Eria spicata</i>               | Spiked Eria                            | Not Assessed  |
| 489 | Plantae | Orchidaceae     | <i>Galeola lindleyana</i>         | Lindley's Galeola                      | Not Assessed  |
| 490 | Plantae | Orchidaceae     | <i>Goodyera foliosa</i>           | Foliose Rattlesnake Plantain           | Not Assessed  |
| 491 | Plantae | Orchidaceae     | <i>Goodyera schlechtendaliana</i> | Schlectendal's Rattlesnake<br>Plantain | Not Assessed  |
| 492 | Plantae | Orchidaceae     | <i>Liparis bootanensis</i>        | Bhutanese Widelip Orchid               | Not Assessed  |
| 493 | Plantae | Orchidaceae     | <i>Liparis resupinata</i>         | Bending Widelip Orchid                 | Not Assessed  |
| 494 | Plantae | Orchidaceae     | <i>Monomeria barbata</i>          | Barbed Monomeria                       | Not Assessed  |

## Electronic Supplementary Material.

|     |         |                    |                                    |                           |               |
|-----|---------|--------------------|------------------------------------|---------------------------|---------------|
| 495 | Plantae | Orchidaceae        | <i>Otochilus lancilabius</i>       | Lanceolate-lip Otochilus  | Not Assessed  |
| 496 | Plantae | Orchidaceae        | <i>Panisea demissa</i>             | Nodding Panisea           | Not Assessed  |
| 497 | Plantae | Orchidaceae        | <i>Phaelaenopsis taenialis</i>     | Segmented Moth Orchid     | Not Assessed  |
| 498 | Plantae | Orchidaceae        | <i>Phaius tankervilleae</i>        | Nun's-hood Orchid         | Not Assessed  |
| 499 | Plantae | Orchidaceae        | <i>Pholidota pallida</i>           | Pale Pholidota            | Not Assessed  |
| 500 | Plantae | Orchidaceae        | <i>Pholidota recurva</i>           | Curved Pholidota          | Not Assessed  |
| 501 | Plantae | Orchidaceae        | <i>Phreatia elegans</i>            | Elegant Phreatia          | Not Assessed  |
| 502 | Plantae | Orchidaceae        | <i>Pleione praecox</i>             | Early-blooming Pleione    | Not Assessed  |
| 503 | Plantae | Orchidaceae        | <i>Spiranthes sinensis</i>         | Chinese Spiranthes        | Least Concern |
| 504 | Plantae | Orchidaceae        | <i>Tainia minor</i>                | Tiny Tania                | Not Assessed  |
| 505 | Plantae | Orchidaceae        | <i>Vandopsis undulata</i>          | Undulating Vandopsis      | Not Assessed  |
| 506 | Plantae | Oxalidaceae        | <i>Oxalis corniculata</i>          | Creeping Wood-sorrel      | Not Assessed  |
| 507 | Plantae | Papaveraceae       | <i>Corydalis juncea</i>            | Mustard Fumewort          | Not Assessed  |
| 508 | Plantae | Papaveraceae       | <i>Dactylicapnos scandens</i>      | Climbing Bleeding Heart   | Not Assessed  |
| 509 | Plantae | Passifloraceae     | <i>Passiflora edulis</i>           | Passion Flower            | Not Assessed  |
| 510 | Plantae | Paulowniaceae      | <i>Wightia speciosissima</i>       | Showy Wightia             | Not Assessed  |
| 511 | Plantae | Peniaceae          | <i>Penium exiguum</i>              |                           | Not Assessed  |
| 512 | Plantae | Pentaphragaceae    | <i>Eurya cerasifolia</i>           | Red Eurya                 | Not Assessed  |
| 513 | Plantae | Pentaphragaceae    | <i>Eurya japonica</i>              | East Asian Eurya          | Not Assessed  |
| 514 | Plantae | Peranemaceae       | <i>Peranema cyatheoides</i>        |                           | Not Assessed  |
| 515 | Plantae | Peridiniopsidaceae | <i>Peridiniopsis spjeroideum</i>   |                           | Not Assessed  |
| 516 | Plantae | Phrymaceae         | <i>Mazus surculosus</i>            | Suckering Mazus           | Not Assessed  |
| 517 | Plantae | Phyllanthaceae     | <i>Aporosa octandra</i>            | Large Aporosa             | Least Concern |
| 518 | Plantae | Phyllanthaceae     | <i>Glochidion khasicum</i>         | Khas Leafflower Tree      | Not Assessed  |
| 519 | Plantae | Piperaceae         | <i>Peperomia reflexa</i>           | Flexible Pepper Elder     | Not Assessed  |
| 520 | Plantae | Piperaceae         | <i>Piper hamiltonii</i>            | Hamilton's Pepper         | Not Assessed  |
| 521 | Plantae | Piperaceae         | <i>Piper mullesua</i>              | Hill Pepper               | Not Assessed  |
| 522 | Plantae | Piperaceae         | <i>Piper suipigua</i>              | Nepali Pepper             | Not Assessed  |
| 523 | Plantae | Plagiogyriaceae    | <i>Plagiogyria pycnophylla</i>     |                           | Not Assessed  |
| 524 | Plantae | Plantaginaceae     | <i>Lindenbergia grandiflora</i>    | Large-flower Lindenbergia | Not Assessed  |
| 525 | Plantae | Plantaginaceae     | <i>Plantago asiatica</i>           | Asian Plantain            | Not Assessed  |
| 526 | Plantae | Plantaginaceae     | <i>Plantago major</i>              | Broad-leaf Plantain       | Least Concern |
| 527 | Plantae | Poaceae            | <i>Arundinaria racemosa</i>        | Clustered Bamboo          | Not Assessed  |
| 528 | Plantae | Poaceae            | <i>Arundo donax</i>                | Giant Cane                | Least Concern |
| 529 | Plantae | Poaceae            | <i>Bambusa nutans</i>              | Nodding Bamboo            | Not Assessed  |
| 530 | Plantae | Poaceae            | <i>Brachiaria eruciformis</i>      | Sweet Signalgrass         | Least Concern |
| 531 | Plantae | Poaceae            | <i>Cynodon dactylon</i>            | Scutch Grass              | Not Assessed  |
| 532 | Plantae | Cyperaceae         | <i>Cyperus rotundus</i>            | Nut Grass                 | Least Concern |
| 533 | Plantae | Poaceae            | <i>Digitaria cruciata</i>          | Crabgrass                 | Not Assessed  |
| 534 | Plantae | Poaceae            | <i>Drepanostachyum intermedium</i> | Intermediate Cane Bamboo  | Not Assessed  |
| 535 | Plantae | Poaceae            | <i>Eragrostis nutans</i>           | Thalia Lovegrass          | Not Assessed  |
| 536 | Plantae | Poaceae            | <i>Himalayacalamus hookerianus</i> | Blue Bamboo               | Not Assessed  |

## Electronic Supplementary Material.

|     |         |                |                                      |                               |               |
|-----|---------|----------------|--------------------------------------|-------------------------------|---------------|
| 537 | Plantae | Poaceae        | <i>Isachne albens</i>                | White Swamp Millet            | Not Assessed  |
| 538 | Plantae | Poaceae        | <i>Setaria pumila</i>                | Yellow Foxtail                | Not Assessed  |
| 539 | Plantae | Poaceae        | <i>Sporobolus diandrus</i>           | Tussock Dropseed              | Not Assessed  |
| 540 | Plantae | Poaceae        | <i>Thysanolaena maxima</i>           | Tiger Grass                   | Not Assessed  |
| 541 | Plantae | Polygalaceae   | <i>Polygala arillata</i>             | Yellow Milkwort               | Not Assessed  |
| 542 | Plantae | Polygonaceae   | <i>Persicaria capitata</i>           | Japanese Knotweed             | Not Assessed  |
| 543 | Plantae | Polygonaceae   | <i>Persicaria hydropiper</i>         | Marshpepper Knotweed          | Not Assessed  |
| 544 | Plantae | Polygonaceae   | <i>Persicaria maculosa</i>           | Redshank                      | Least Concern |
| 545 | Plantae | Polygonaceae   | <i>Persicaria nepalensis</i>         | Nepal Knotweed                | Not Assessed  |
| 546 | Plantae | Polygonaceae   | <i>Persicaria praetermissa</i>       | Spotted Knotweed              | Not Assessed  |
| 547 | Plantae | Polygonaceae   | <i>Persicaria tenella</i>            | Delicate Knotweed             | Not Assessed  |
| 548 | Plantae | Polygonaceae   | <i>Polygonum filicaule</i>           | Nepal Purslane                | Not Assessed  |
| 549 | Plantae | Polygonaceae   | <i>Polygonum molle</i>               | Knotweed                      | Not Assessed  |
| 550 | Plantae | Polygonaceae   | <i>Polygonum runcinatum</i>          | Lobed-leaf Knotweed           | Not Assessed  |
| 551 | Plantae | Polygonaceae   | <i>Rumex nepalensis</i>              | Nepal Dock                    | Not Assessed  |
| 552 | Plantae | Polypodiaceae  | <i>Arthromeris lachmanii</i>         | Lachman's Arthomeris          | Not Assessed  |
| 553 | Plantae | Polypodiaceae  | <i>Arthromeris wallichiana</i>       | Wallich's Arthomeris          | Not Assessed  |
| 554 | Plantae | Polypodiaceae  | <i>Belvisia henryi</i>               | Henry's Needle Fern           | Not Assessed  |
| 555 | Plantae | Polypodiaceae  | <i>Belvisia spicata</i>              | Spiked Tailed Fern            | Not Assessed  |
| 556 | Plantae | Polypodiaceae  | <i>Lepidogrammitis rostrata</i>      | Curved Lepidogrammitis        | Not Assessed  |
| 557 | Plantae | Polypodiaceae  | <i>Lepisorus loriformis</i>          | Strapped Weeping Fern         | Not Assessed  |
| 558 | Plantae | Polypodiaceae  | <i>Lepisorus scolopendrium</i>       | Hart's Tongue Fern            | Not Assessed  |
| 559 | Plantae | Polypodiaceae  | <i>Lepisorus sublinearis</i>         | East Himalayan Tongue Fern    | Not Assessed  |
| 560 | Plantae | Polypodiaceae  | <i>Microsorium membranaceum</i>      | Thin-leaf Birdsnest Fern      | Not Assessed  |
| 561 | Plantae | Polypodiaceae  | <i>Polypodiodes hendersonii</i>      | Henderson's Resurrection Fern | Not Assessed  |
| 562 | Plantae | Polypodiaceae  | <i>Polypodioides lachnopus</i>       | Himalayan Resurrection Fern   | Not Assessed  |
| 563 | Plantae | Polypodiaceae  | <i>Pyrrosia lingua</i>               | Felt Fern                     | Not Assessed  |
| 564 | Plantae | Pontederiaceae | <i>Monochoria vaginalis</i>          | Pickerel Weed                 | Least Concern |
| 565 | Plantae | Primulaceae    | <i>Lysimachia dubia</i>              | Nodding Loosetrife            | Least Concern |
| 566 | Plantae | Primulaceae    | <i>Ardisia macrophylla</i>           | Large-flower Coralberry       | Not Assessed  |
| 567 | Plantae | Primulaceae    | <i>Lysimachia laxa</i>               | Creeping Loosetrife           | Not Assessed  |
| 568 | Plantae | Primulaceae    | <i>Maesa chisia</i>                  | Scaling Red Maesa             | Not Assessed  |
| 569 | Plantae | Primulaceae    | <i>Maesa rugosa</i>                  | Wrinkle-leaf Maesa            | Not Assessed  |
| 570 | Plantae | Primulaceae    | <i>Myrsine semiserrata</i>           | Blueberry Myrtle              | Least Concern |
| 571 | Plantae | Pteridaceae    | <i>Adiantum incisum</i>              | Shingled Maidenhair Fern      | Not Assessed  |
| 572 | Plantae | Pteridaceae    | <i>Coniogramme procera</i>           | High Bamboo fern              | Not Assessed  |
| 573 | Plantae | Pteridaceae    | <i>Onychium<br/>cryptogrammoides</i> | Cryptic Claw Fern             | Not Assessed  |
| 574 | Plantae | Pteridaceae    | <i>Pteris biurata</i>                | Ladder Brake                  | Not Assessed  |
| 575 | Plantae | Pteridaceae    | <i>Pteris spinescens</i>             | Spiny Ladder Brake            | Not Assessed  |
| 576 | Plantae | Pteridaceae    | <i>Pteris vittata</i>                | Banded Ladder Brake           | Not Assessed  |

## Electronic Supplementary Material.

|     |         |               |                                   |                             |               |
|-----|---------|---------------|-----------------------------------|-----------------------------|---------------|
| 577 | Plantae | Pteridaceae   | <i>Vittaria elongata</i>          | Stiff Shoestring Fern       | Not Assessed  |
| 578 | Plantae | Pteridaceae   | <i>Vittaria flexuosa</i>          | Flexible Shoestring Fern    | Not Assessed  |
| 579 | Plantae | Ranunculaceae | <i>Ranunculus diffusus</i>        | Spreading Buttercup         | Not Assessed  |
| 580 | Plantae | Rosaceae      | <i>Agrimonia pilosa</i>           | Hairy Agrimony              | Not Assessed  |
| 581 | Plantae | Rosaceae      | <i>Duchesnea indica</i>           | Mock Strawberry             | Not Assessed  |
| 582 | Plantae | Rosaceae      | <i>Eriobotrya petiolata</i>       | East Himalayan Loquat       | Not Assessed  |
| 583 | Plantae | Rosaceae      | <i>Fragaria nubicola</i>          | Himalayan Strawberry        | Not Assessed  |
| 584 | Plantae | Rosaceae      | <i>Neillia rubiflora</i>          | East Himalayan Neillia      | Not Assessed  |
| 585 | Plantae | Rosaceae      | <i>Neillia thyrsiflora</i>        | White-flowered Neillia      | Least Concern |
| 586 | Plantae | Rosaceae      | <i>Photinia integrifolia</i>      | Himalayan Chokeberry        | Least Concern |
| 587 | Plantae | Rosaceae      | <i>Potentilla lineata</i>         | Lined Cinquefoil            | Not Assessed  |
| 588 | Plantae | Rosaceae      | <i>Potentilla peduncularis</i>    | East Himalayan Cinquefoil   | Not Assessed  |
| 589 | Plantae | Rosaceae      | <i>Potentilla polyphylla</i>      | Many-leafed Cinquefoil      | Not Assessed  |
| 590 | Plantae | Rosaceae      | <i>Potentilla sundaica</i>        | Javan Cinquefoil            | Not Assessed  |
| 591 | Plantae | Rosaceae      | <i>Prunus cerasoides</i>          | Wild Himalayan Cherry       | Least Concern |
| 592 | Plantae | Rosaceae      | <i>Prunus nepalensis</i>          | Nepalese Flowering Cherry   | Not Assessed  |
| 593 | Plantae | Rosaceae      | <i>Rubus ellipticus</i>           | Himalayan Raspberry         | Not Assessed  |
| 594 | Plantae | Rosaceae      | <i>Rubus paniculatus</i>          | Heart-leaf Raspberry        | Not Assessed  |
| 595 | Plantae | Rubiaceae     | <i>Boenninghausenia albiflora</i> | White Himalayan Rue         | Not Assessed  |
| 596 | Plantae | Rubiaceae     | <i>Chassalia curviflora</i>       | Curved-flower Snake-root    | Not Assessed  |
| 597 | Plantae | Rubiaceae     | <i>Evodia fraxinifolia</i>        | Himalayan Bee Bee           | Not Assessed  |
| 598 | Plantae | Rubiaceae     | <i>Galium asprellum</i>           | Rough Bedstraw              | Least Concern |
| 599 | Plantae | Rubiaceae     | <i>Galium elegans</i>             | Elegant Goose-grass         | Not Assessed  |
| 600 | Plantae | Rubiaceae     | <i>Hymenodictyon flaccidum</i>    | Weeping Couch Tree          | Not Assessed  |
| 601 | Plantae | Rubiaceae     | <i>Ixora athroantha</i>           | Giner-flower Jungle Flame   | Not Assessed  |
| 602 | Plantae | Rubiaceae     | <i>Knoxia sumatrensis</i>         | Sumatra Knoxia              | Not Assessed  |
| 603 | Plantae | Rubiaceae     | <i>Lasianthus biermannii</i>      | Bierman's Lasianthus        | Not Assessed  |
| 604 | Plantae | Rubiaceae     | <i>Mussaenda macrophylla</i>      | Round-petal Mussaenda       | Not Assessed  |
| 605 | Plantae | Rubiaceae     | <i>Neanotis gracilis</i>          | Slender Starviolet          | Not Assessed  |
| 606 | Plantae | Rubiaceae     | <i>Neohymenopogon parasiticus</i> | Parasitic Mussaenda         | Not Assessed  |
| 607 | Plantae | Rubiaceae     | <i>Oldenlandia verticillata</i>   | Whorled Oldenlandia         | Not Assessed  |
| 608 | Plantae | Rubiaceae     | <i>Ophiorrhiza fasciculata</i>    | Fascicled-flower Snake-root | Not Assessed  |
| 609 | Plantae | Rubiaceae     | <i>Ophiorrhiza heterostyla</i>    | Pin-flower Snake-root       | Not Assessed  |
| 610 | Plantae | Rubiaceae     | <i>Ophiorrhiza rugosa</i>         | Wrinkle-leaf Snake-root     | Not Assessed  |
| 611 | Plantae | Rubiaceae     | <i>Ophiorrhiza treutleri</i>      | Treutler's Snake-root       | Not Assessed  |
| 612 | Plantae | Rubiaceae     | <i>Rubia manjith</i>              | Manjith                     | Not Assessed  |
| 613 | Plantae | Rutaceae      | <i>Rubus rugosa</i>               | Wrinkle-leaf Wildbud        | Not Assessed  |
| 614 | Plantae | Rutaceae      | <i>Rubus sumatranus</i>           | Sumatran Raspberry          | Not Assessed  |
| 615 | Plantae | Rutaceae      | <i>Zanthoxylum acanthopodium</i>  | Indonesian Lemon Pepper     | Not Assessed  |
| 616 | Plantae | Rutaceae      | <i>Zanthoxylum oxyphyllum</i>     | Prickly Ash                 | Not Assessed  |
| 617 | Plantae | Sabiaceae     | <i>Sabia campanulata</i>          | Bellflower Sabia            | Not Assessed  |
| 618 | Plantae | Santalaceae   | <i>Pyralia edulis</i>             | Himalayan Buffalo Nut       | Least Concern |



## Electronic Supplementary Material.

|     |         |                  |                                    |                           |                 |
|-----|---------|------------------|------------------------------------|---------------------------|-----------------|
| 619 | Plantae | Sapindaceae      | <i>Acer campbellii</i>             | Campbell's Maple          | Least Concern   |
| 620 | Plantae | Sapindaceae      | <i>Acer sikkimense</i>             | Sikkimese Maple           | Not Assessed    |
| 621 | Plantae | Sapotaceae       | <i>Mussaenda frondosa</i>          | Dhobi Tree                | Not Assessed    |
| 622 | Plantae | Saxifragaceae    | <i>Chrysosplenium nepalense</i>    | Nepalese Saxifrage        | Not Assessed    |
| 623 | Plantae | Scrophulariaceae | <i>Hemiphragma heterophylla</i>    | Creeping Hemiphragma      | Not Assessed    |
| 624 | Plantae | Selaginellaceae  | <i>Selaginella monospora</i>       | Single-spored Spike Moss  | Not Assessed    |
| 625 | Plantae | Selenastraceae   | <i>Ankistrodesmus arcuatus</i>     |                           | Not Assessed    |
| 626 | Plantae | Selenastraceae   | <i>Monoraphidium nanum</i>         |                           | Not Assessed    |
| 627 | Plantae | Selenastraceae   | <i>Monoraphidium pseudobraunii</i> |                           | Not Assessed    |
| 628 | Plantae | Selenastraceae   | <i>Monoraphidium tortile</i>       |                           | Not Assessed    |
| 629 | Plantae | Smilacaceae      | <i>Smilax aspera</i>               | Rough Bindweed            | Not Assessed    |
| 630 | Plantae | Smilacaceae      | <i>Smilax perfoliata</i>           | Perforated Greenbrier     | Not Assessed    |
| 631 | Plantae | Solanaceae       | <i>Brugmansia suaveolens</i>       | Angel's Trumpet           | Extinct in Wild |
| 632 | Plantae | Solanaceae       | <i>Cestrum fasciculatum</i>        | Early-flowering Jesamine  | Not Assessed    |
| 633 | Plantae | Solanaceae       | <i>Cestrum nocturnum</i>           | Night Jessamine           | Least Concern   |
| 634 | Plantae | Solanaceae       | <i>Nicandra physalodes</i>         | Shoo-fly Plant            | Not Assessed    |
| 635 | Plantae | Solanaceae       | <i>Solanum aculeatissimum</i>      | Dutch Eggplant            | Not Assessed    |
| 636 | Plantae | Solanaceae       | <i>Solanum americanum</i>          | American Black Nightshade | Not Assessed    |
| 637 | Plantae | Solanaceae       | <i>Solanum viarum</i>              | Tropical Soda Apple       | Not Assessed    |
| 638 | Plantae | Sphagnaceae      | <i>Sphagnum nepalense</i>          | Himalayan Bog-moss        | Not Assessed    |
| 639 | Plantae | Sphagnaceae      | <i>Sphagnum palustre</i>           | Blunt-leaf Bog-moss       | Not Assessed    |
| 640 | Plantae | Symplocaceae     | <i>Symplocos dryophila</i>         | Oak Sweetleaf             | Least Concern   |
| 641 | Plantae | Symplocaceae     | <i>Symplocos glomerata</i>         | Clustered Sweetleaf       | Least Concern   |
| 642 | Plantae | Symplocaceae     | <i>Symplocos lucida</i>            | White Sweetleaf           | Not Assessed    |
| 643 | Plantae | Symplocaceae     | <i>Symplocos sumuntia</i>          | Sumun Sweetleaf           | Not Assessed    |
| 644 | Plantae | Theaceae         | <i>Camellia sinensis</i>           | Wild Tea                  | Data Deficient  |
| 645 | Plantae | Theaceae         | <i>Camellia kissii</i>             | Nepal Camellia            | Least Concern   |
| 646 | Plantae | Theaceae         | <i>Schima wallichii</i>            | Wallich's Needlewood      | Least Concern   |
| 647 | Plantae | Thelpteridaceae  | <i>Metathelypteris flaccida</i>    |                           | Not Assessed    |
| 648 | Plantae | Thelpteridaceae  | <i>Pseudophegopteris aurita</i>    |                           | Not Assessed    |
| 649 | Plantae | Thymelaeaceae    | <i>Daphne papyracea</i>            | Indian Paper Bush         | Not Assessed    |
| 650 | Plantae | Thymelaeaceae    | <i>Edgeworthia gardneri</i>        | Nepalese Paper Bush       | Not Assessed    |
| 651 | Plantae | Ulotrichaceae    | <i>Ulothrix limnetica</i>          |                           | Not Assessed    |
| 652 | Plantae | Ulotrichaceae    | <i>Ulothrix tenerrima</i>          |                           | Not Assessed    |
| 653 | Plantae | Uronemataceae    | <i>Uronema confervicola</i>        |                           | Not Assessed    |
| 654 | Plantae | Urticaceae       | <i>Boehmeria clidemioides</i>      | Grass Nettle              | Not Assessed    |
| 655 | Plantae | Urticaceae       | <i>Chamabainia cuspidata</i>       | Cuspid Wood-nettle        | Not Assessed    |
| 656 | Plantae | Urticaceae       | <i>Debregeasia longifolia</i>      | Wild Orange Rhea          | Least Concern   |
| 657 | Plantae | Urticaceae       | <i>Elatostema platyphyllum</i>     | Flat-leaf Scrub Spinach   | Not Assessed    |
| 658 | Plantae | Urticaceae       | <i>Elatostema reticulatum</i>      | Reticulated Scrub Spinach | Not Assessed    |
| 659 | Plantae | Urticaceae       | <i>Elatostema sessile</i>          | Stalkless Scrub Spinach   | Not Assessed    |
| 660 | Plantae | Urticaceae       | <i>Girardinia palmata</i>          | Himalayan Nettle          | Not Assessed    |

## Electronic Supplementary Material.

|     |         |               |                                   |                              |               |
|-----|---------|---------------|-----------------------------------|------------------------------|---------------|
| 661 | Plantae | Urticaceae    | <i>Laportea bulbifera</i>         | Bulbous Wood-nettle          | Not Assessed  |
| 662 | Plantae | Urticaceae    | <i>Lecanthus peduncularis</i>     | Stalked Dishead              | Not Assessed  |
| 663 | Plantae | Urticaceae    | <i>Pilea anisophylla</i>          | Anise-leaf Clearweed         | Not Assessed  |
| 664 | Plantae | Urticaceae    | <i>Pilea scripta</i>              | Himalayan Clearweed          | Not Assessed  |
| 665 | Plantae | Urticaceae    | <i>Pilea symmeria</i>             | Indian Clearweed             | Not Assessed  |
| 666 | Plantae | Urticaceae    | <i>Pilea umbrosa</i>              | Dusky Clearweed              | Not Assessed  |
| 667 | Plantae | Urticaceae    | <i>Pouzolzia hirta</i>            | Hairy Pouzolz's Bush         | Not Assessed  |
| 668 | Plantae | Urticaceae    | <i>Pouzolzia sanguinea</i>        | Red Pouzolz's Bush           | Not Assessed  |
| 669 | Plantae | Urticaceae    | <i>Procris crenata</i>            | Scalloped Procris            | Not Assessed  |
| 670 | Plantae | Urticaceae    | <i>Urtica dioica</i>              | Stinging Nettle              | Least Concern |
| 671 | Plantae | Urticaceae    | <i>Urtica parviflora</i>          | Small-flower Stinging Nettle | Not Assessed  |
| 672 | Plantae | Violaceae     | <i>Viola canescens</i>            | Himalayan White Violet       | Not Assessed  |
| 673 | Plantae | Violaceae     | <i>Viola betonicifolia</i>        | Mountain Violet              | Not Assessed  |
| 674 | Plantae | Violaceae     | <i>Viola hamiltoniana</i>         | Hamilton's Violet            | Not Assessed  |
| 675 | Plantae | Vitaceae      | <i>Parthenocissus semicordata</i> | Himalayan Woodbine           | Not Assessed  |
| 676 | Plantae | Vitaceae      | <i>Tetrastigma bractolatum</i>    | Indian Chestnut Vine         | Not Assessed  |
| 677 | Plantae | Vitaceae      | <i>Tetrastigma rumicispermum</i>  | Warty Chestnut Vine          | Not Assessed  |
| 678 | Plantae | Vitaceae      | <i>Tetrastigma serrulatum</i>     | Toothed Chestnut Vine        | Not Assessed  |
| 679 | Plantae | Zingiberaceae | <i>Cautleya gracilis</i>          | Hardy Ginger                 | Not Assessed  |
| 680 | Plantae | Zingiberaceae | <i>Hedychium ellipticum</i>       | Rock Butterfly Ginger-lily   | Not Assessed  |
| 681 | Plantae | Zingiberaceae | <i>Hedychium gracile</i>          | Dainty Ginger-lily           | Not Assessed  |
| 682 | Plantae | Zygnemataceae | <i>Spirogyra rivularis</i>        |                              | Not Assessed  |

**Table 2.** Hydrology and nutrient dynamics of Khecheopalri peatland (Roy and Thapa 1999, 1995; Venu et al. 1990)

| Factors                                          | TS          |                 |               |
|--------------------------------------------------|-------------|-----------------|---------------|
|                                                  | 1981 - 1983 | 1994 - 1995     | 1998          |
| Air Temperature (°C)                             | 25.5        | 10.2 ± 1.17     | -             |
| Water Temperature (°C)                           | 24          | 8.5 ± 1.83      | -             |
| pH                                               | 8.6         | 6.1 ± 0.36      | 5.4-6.8       |
| Phenolphthalein Alkalinity (mg l <sup>-1</sup> ) | 8.2         | -               | -             |
| Methyl Orange Alkalinity (mg l <sup>-1</sup> )   | 9.6         | -               | -             |
| Total Alkalinity (mg l <sup>-1</sup> )           | 28.4        | 7.08 ± 1.53     | -             |
| Phenolphthalein Acidity (mg l <sup>-1</sup> )    | 6.3         | -               | -             |
| Methyl Orange Acidity (mg l <sup>-1</sup> )      | 2.1         | -               | -             |
| Total Acidity (mg l <sup>-1</sup> )              | -           | 12.20 ± 2.61    | -             |
| Free Carbon Dioxide (mg l <sup>-1</sup> )        | 2.34        | 5.05 ± 1.17     | -             |
| Bicarbonates (mg l <sup>-1</sup> )               | 2.20        | -               | -             |
| Calcium (mg l <sup>-1</sup> )                    | 14.6        | 2.22 ± 0.43     | 1.443 - 3.340 |
| Carbonates (mg l <sup>-1</sup> )                 | 0.34        | -               | -             |
| Chlorides (mg l <sup>-1</sup> )                  | 32.6        | 2.55 ± 0.22     | -             |
| Iron (mg l <sup>-1</sup> )                       | -           | 0.14 ± 0.17     | -             |
| Magnesium (mg l <sup>-1</sup> )                  | 9.8         | -               | -             |
| Nitrates (mg l <sup>-1</sup> )                   | 0.38        | 0.132 ± 0.042   | 0.051 - 0.234 |
| Phosphates (mg l <sup>-1</sup> )                 | -           | 0.807 ± 0.176   | 0.332 - 2.683 |
| Potassium (mg l <sup>-1</sup> )                  | -           | 0.0161          | 0.006 - 0.100 |
| Silicates (mg l <sup>-1</sup> )                  | 13.5        | 5.99 ± 1.03     | -             |
| Sodium (mg l <sup>-1</sup> )                     | -           | 0.093 ± 0.053   | 0.007 - 0.026 |
| Sulfates (mg l <sup>-1</sup> )                   | 28.6        | -               | -             |
| Total Dissolved Salts (mg l <sup>-1</sup> )      | -           | 41.39 ± 5.53    | -             |
| Total Solids (mg l <sup>-1</sup> )               | 96.0        | 113.98 ± 7.59   | 75.3 - 195.1  |
| Suspended Solids (mg l <sup>-1</sup> )           | 56.0        | 72.59 ± 4.22    | -             |
| Dissolved Oxygen (Surfaced; mg l <sup>-1</sup> ) | 7.84        | 6.79 ± 1.88     | 5.4 - 8.4     |
| Dissolved Oxygen (Bottom; mg l <sup>-1</sup> )   |             |                 |               |
| 0.3 meter depth                                  | 5.62        | 6.79 ± 3.54     | -             |
| 0.6 m depth                                      | 7.8         | -               | -             |
| Specific Conductivity (u ohms/cm)                | -           | 376.75 ± 173.59 | -             |
| Transparency (cm)                                | -           | 20.11 ± 2.54    | -             |

**Table 3.** Allometric equations for common tree species within the Khecheopalri watershed (Sundriyal and Sharma 1996, 1994)

| <b>Tree Species</b>            | <b>Regression Equation</b>           | <b>d.f.</b> | <b>r</b> | <b>E</b> |
|--------------------------------|--------------------------------------|-------------|----------|----------|
| <i>Quercus lamellosa</i>       | $y = \exp(-0.948 + 0.826 \ln(D^2H))$ | 27          | 0.947    | 1.077    |
| <i>Castanopsis tribuloides</i> | $y = \exp(0.807 + 0.595 \ln(D^2H))$  | 38          | 0.908    | 1.049    |
| <i>Symplocos theaeifolia</i>   | $y = \exp(0.520 + 0.594 \ln(D^2H))$  | 17          | 0.935    | 1.066    |
| <i>Eurya acuminata</i>         | $y = \exp(1.165 + 0.514 \ln(D^2H))$  | 19          | 0.860    | 1.073    |
| <i>Alnus nepalensis</i>        | $y = \exp(-2.847 + 0.839 \ln(D^2H))$ | 8           | 0.967    | 1.030    |
